# Supplementary material for: Testing animal-assisted cleaning prior to transplantation in coral reef restoration
Source: PeerJ. 2015 Sep 29;3:e1287. doi: 10.7717/peerj.1287 (PMC4592152; doi:10.7717/peerj.1287)
Supplement: Supplemental Information 1 — This Excel file contains the raw data obtained during the baseline fish surveys conducted at the transplantation site, November 2013. [file peerj-03-1287-s002.xlsx]

## Sheet: Fish surveys November 2013
Frias-Torres S, van de Geer C. Testins animal-assisted cleaning prior to transplantation in coral reef restoration
					TRANSPLANTATION SITE SURVEY
RAW DATA-Fish Surveys Transplantation Site - November 2013					FAMILY	SPECIES IN FAMILY
RED = species also recorded at experimental setup, transplantation site					Labridae	12		Lab	12												Transplantation
		Trophic			Acanthuridae	5		Aca	5
	Transplanted	Level			Serranidae	4		Ser	4
Species name	Average density	Fish Base			Pomacentridae	4		Pom	4
Abudeduf sexfasciatus	0.0113177	2.7 ±0.30 se			Chaetodontidae	4		Cha	4
Acanthurus dussumieri	0.0169765	2.0 ±0.00 se;			Balistidae	3		Bal	3
Acanthurus leucosternon	0.00565884	2.0 ±0.00 se			Mullidae	2		Mul	2
Acanthurus nigricauda	0.053759	3.0 ±0.40 se;			Pomacanthidae	2		Poc	2
Acanthurus triostegus	0.0292374	2.0 ±0.00 se;			Microdesmidae	2		Mic	2
Aethaloperca rogaa	0.00565884	4.2 ±0.71 se			Lutjanidae	1		Oth	1
Amphiprion fuscocaudatus	0.0113177	2.7 ±0.31			Bleniidae	1
Aprion virescens	0.00565884	4.3 ±0.4 se			Monacanthidae	1
Aspidontus taeniatus	0.00565884	3.8 ±0.51 se			Tetraodontidae	1
Balistoides viridescens	0.00565884	3.3 se0.44			Carangidae	1
Cantherhines pardalis	0.00707355	3.5 ±0.37 se			Apogonidae	1
Canthigaster valentini	0.013204	2.8 se0.3			Cirrhitidae	1
Carangoides fulvoguttatus	0.00565884	4.4 ±0.5 se			Syngnathidae	1
Cephalopholis argus	0.0113177	4.5 ±0.0 se			Lethrinidae	1
Chaetodon guttatissimus	0.00754512	3.2 se0.5			Pinguipedidae	1
Chaetodon trifascialis	0.00565884	3.3 ±0.6 se			Ephippidae	1
Chaetodon trifasciatus	0.0113177	3.3 ±0.6 se;			Synodontidae (indicus)	1
Chaetodon zanzibariensis	0.00565884	3.3 ±0.61 se;			Zanclidae	1
Cheilio inermis	0.00754512	3.5 se0.5			SUM	51
Chromis dimidiata	0.0094314	4.0 ±0.66 se
Cirrhilabrus exquisitus	0.14713	3.4 se0.45
Cirrhitichthys oxycephalus	0.00565884	4.0 ±0.66 se;			TRANSPLANTATION EXPERIMENT
Coris formosa	0.00905415	3.3 se0.38			FAMILY	SPECIES IN FAMILY
Dascyllus carneus	0.0113177	2.0 ±0.00 se			Labridae	7		Lab	7
Doryramphus sp.	0.0113177	3.5 ±0.44 se;			Acanthuridae	4		Aca	4
Gnatholepis scapulostigma	0.00565884	3.7 ±0.6 se			Balistidae	3		Bal	3
Gomphosus caeruleus	0.00848826	3.5 ±0.37 se			Pomacanthidae	2		Poc	2
Halichoeres hortulanus	0.00754512	3.4 ±0.42 se			Chaetodontidae	2		Cha	2
Halichoeres nebulosus	0.0367825	3.4 se0.5			Siganidae	2		Sig	2
Hemigymnus fasciatus	0.00565884	3.5 ±0.37 se			Tetraodontidae	2		Tet	2
Labroides dimidiatus	0.0127324	3.5 se0.5			Diodontidae	2		Dio	2
Melichthys niger	0.00565884	3.9 ±0.2 se			Lutjanidae	1		Oth	1
Parapercis hexophtalma	0.00707355	3.6 se0.3			Pomacentridae	1
Parupeneus cyclostomus	0.0169765	4.2 ±0.6 se			Pinguipedidae	1
Parupeneus macronema	0.0113177	3.5 ±0.37 se;			Bleniidae	1
Plectorhinchus vittatus	0.0113177	4.0 ±0.64 se			Zanclidae	1
Pomacanthus imperator	0.00565884	2.7 se0			Monacanthidae	1
Pomacanthus semicirculatus	0.00565884	2.5 se0			Ostraciidae	1
Pomacentrus caeruleus	1.3204	2.7 se0.3			Lethrinidae	1
Pomacentrus sulfureus	0.00565884	2.6 ±0.3 se;			SUM	32
Pseudocheilinus hexataenia	0.0113177	3.2 ±0.0 se;
Ptereleotris evides	0.00848826	3.4 ±0.45 se;
Rhinecanthus aculeatus	0.073565	3.4 ±0.45 se;
Scarus ghobban	0.0268795	2.0 ±0.0 se;
Scarus rubroviolaceus	0.0135812	2.0 se0
Siganus argenteus	0.0237671	2.6 ±0.29 se
Sufflamen bursa	0.00565884	2.9 ±0.0 se;
Sufflamen chrysopterus	0.00848826	3.5 se0.41							TRANS
Thalassoma herbraicum	0.00565884	4.3 ±0.7 se
Variola louti	0.00565884	4.3 ±0.7			Transplantation
Zanclus cornutus	0.0101859	2.5 se 0				Herbivores	6
						Omnivores	8
						Sec. consumers	26
						Carnivores	11
					Transplantation
					experiment
						Herbivores	6
						Omnivores	6
						Sec. consumers	19
						Carnivores	1
