# Supplementary material for: Testing animal-assisted cleaning prior to transplantation in coral reef restoration
Source: PeerJ. 2015 Sep 29;3:e1287. doi: 10.7717/peerj.1287 (PMC4592152; doi:10.7717/peerj.1287)
Supplement: Supplemental Information 2 — This Excel file contains the raw data of species found feeding at the experimental setup at the transplantation (treatment) and nursery (control) sites, based on video recordings with GoPro cameras. [file peerj-03-1287-s003.xlsx]

## Sheet: Transplantation Site
Frias-Torres S, van de Geer C. Testing animal-assisted cleaning prior to transplantation in coral reef restoration
RAW DATA-TRANSPLANTATION (TREATMENT) SITE
Species video recorded (GoPro) feeding at the experimental setup
(*) species interacted longest time, most commonly present
	Species
Camera Session	Scientific Name	Common Name
2013-11-21	Acanthurus tennenti	Tennent's Surgeonfish
Start: 9:58	Cantherhines fronticinctus	Spectacled Filefish
Finish: 11:30	Canthigaster valentini	Black Saddled Toby
Depth: 12.0m	Chaetodon auriga*	Threadfin Butterflyfish
Temp: 28 C	Chaetodon xanthocephalus*	Yellowhead Butterflyfish
	Cheilinus trilobatus	Tripletail Wrasse
	Halichoeres nebulosus*	Nebulous Wrasse
	Labroides dimidiatus	Bluestreak Cleaner Wrasse
	Lactoria cornuta	Longhorn Cowfish
	Pomacanthus semicirculatus*	Semi-circle Angelfish
	Scarus rubroviolaceus	Ember Parrotfish
	Sufflamen chrysopterus*	Flagtail Triggerfish
	Zanclus cornutus*	Moorish Idol
2013-11-26	Acanthurus tennenti	Tennent's Surgeonfish
Start: 11:06	Chaetodon auriga*	Threadfin Butterflyfish
Finish: 14:04	Chaetodon xanthocephalus*	Yellowhead Butterflyfish
Depth: 10.9m	Cheilinus trilobatus	Tripletail Wrasse
Temp: 28 °C	Coris formosa	Queen Coris
	Halichoeres nebulosus*	Nebulous Wrasse
	Pomacanthus imperator	Emperor angelfish
	Scarus rubroviolaceus	Ember Parrotfish
	Siganus stellatus	Rabbit
	Sufflamen chrysopterus*	Flagtail Triggerfish
	Zanclus cornutus*	Moorish Idol
	Zebrasoma desjardini	Sailfin Tang
2013-11-28	Acanthurus leucocheilus	Palelipped surgeonfish
Start: 14:31	Acanthurus nigricauda
Finish: 16:46	Acanthurus tennenti	Tennent's Surgeonfish
Depth: 11.2m	Balistapus undulatus	Orange-lined trigger
Temp: 28 °C	Balistoides viridescens	Titan triggerfish
	Canthigaster valentini	Black Saddled Toby
	Chaetodon auriga*	Threadfin Butterflyfish
	Chaetodon xanthocephalus*	Yellowhead Butterflyfish
	Cheilinus trilobatus	Tripletail Wrasse
	Cirrhilabrus exquisitus	Exquisite wrasse
	Coris aygula	Clown coris
	Coris formosa	Queen Coris
	Halichoeres nebulosus*	Nebulous Wrasse
	Labroides dimidiatus	Cleaner wrasse
	Lethrinus mashena	Sky emperor
	Pomacanthus imperator	Emperor angelfish
	Pomacanthus semicirculatus*	Semi-circle Angelfish
	Scarus rubroviolaceus	Ember Parrotfish
	Siganus argenteus	Forktail rabbitfish
	Sufflamen chrysopterus*	Flagtail Triggerfish
	Zanclus cornutus*	Moorish Idol
2013-12-03	Arathron meleagris	Guineafowl Puffer
Start: 12:50	Aspidontus dussumieri	Slender Sabretooth Blenny
Finish: 16:42	Balistoides viridescens	Titan Triggerfish
Depth: 11.0m	Chaetodon auriga	Threadfin Butterflyfish
Temp: 28 C	Cheilinus trilobatus	Tripletail Wrasse
	Coris formosa	Queen Coris
	Diodon hystrix	Porcupinefish
	Diodon liturosus	Black-Blotched Porcupinefish
	Halichoeres nebulosus*	Nebulous Wrasse
	Labroides dimidiatus	Bluestreak Cleaner Wrasse
	Lutjanus lemniscatus	Yellowstreaked Snapper
	Parapercis hexophtalma	Sandperch
	Pomacentrus caeruleus	Blue-Yellow Damselfish
	Scarus rubroviolaceus	Ember Parrotfish
	Sufflamen chrysopterus*	Flagtail Triggerfish
	Zanclus cornutus	Moorish Idol
2013-12-05	Acanthurus tennenti	Tennent's Surgeonfish
Start: 13:48	Balistoides viridescens	Titan triggerfish
Finish:	Canthigaster valentini	Black Saddled Toby
Depth: 11.2m	Chaetodon auriga*	Threadfin Butterflyfish
Temp: 28 °C	Halichoeres nebulosus*	Nebulous Wrasse
	Octopus
	Pomacanthus semicircularis*	Semi-circle Angelfish
	Scarus rubroviolaceus	Ember Parrotfish
	Sufflamen chrysopterus*	Flagtail Triggerfish
	Zanclus cornutus*	Moorish Idol

## Sheet: Nursery Site
Frias-Torres S, van de Geer C. Testing animal-assisted cleaning prior to transplantation in coral reef restoration
RAW DATA-NURSERY (CONTROL) SITE
Species video recorded (GoPro) feeding at the experimental setup
	Species
Camera Session	Scientific Name	Common Name
2013-12-16	Lactoria fornasini	Thornback Cowfish
Start: 15:00
Finish: 17:53
Depth: 17m
Temp: 28 C
Fish that were seen on the video but did not interact with the rope:
Xyrichtys sp.	Razorfish
Diodon sp.	Porcupinefish
Parupeneus sp.	Goatfish
Letrinus sp.	Emperor
No more fish recorded during the rest of the camera sessions at nursery site
