# Supplementary material for: Testing animal-assisted cleaning prior to transplantation in coral reef restoration
Source: PeerJ. 2015 Sep 29;3:e1287. doi: 10.7717/peerj.1287 (PMC4592152; doi:10.7717/peerj.1287)
Supplement: Supplemental Information 3 — This Excel file contains raw data of the barnacle predation quantified at the experimental setup at the transplantation (treatment) and nursery (control) sites. Data are shown by site and depth. [file peerj-03-1287-s004.xlsx]

## Sheet: Barnacles eaten
				Frias-Torres S, van de Geer C. Testing animal assisted cleaning prior to transplantation in coral reef restoration
				RAW DATA-BARNACLES EATEN AT EXPERIMENTAL SETUP, TRANSPLANTATION (TREATMENT) AND NURSERY (CONTROL) SITES
Transplantation		Before	After	Before/after	1-(before/after)	Negative values corrected	% Barnacles eaten	Ranked % Barn Eaten	Number of Barnacles eaten
8m	NORTH (1)	40	38	0.95	0.05	0.05	0.05	14	2		Mean value 8m	0.0437984
6m		27	25	0.925926	0.0740741	0.0740741	0.0740741	16	2		Mean value 6m	0.106684
4m		94	96	1.02128	-0.0212766	0	0	5.5	-2		Mean value 4m	0.01
2m		94	0	0	1	1	1	29.5	94		Mean value 2m	0.832655
0,3m		72	5	0.0694444	0.930556	0.930556	0.930556	28	67		Mean value 0,3m	0.947612
8m	SOUTH (2)	86	79	0.918605	0.0813953	0.0813953	0.0813953	17	7
6m		87	83	0.954023	0.045977	0.045977	0.045977	14	4
4m		100	97	0.97	0.03	0.03	0.03	12	3
2m		59	19	0.322034	0.677966	0.677966	0.677966	25	40
0,3m		57	5	0.0877193	0.912281	0.912281	0.912281	27	52
8m	SOUTH (3)	55	61	1.10909	-0.109091	0	0	5.5	-6
6m		35	28	0.8	0.2	0.2	0.2	20.5	7
4m		16	16	1	0	0	0	5.5	0
2m		50	9	0.18	0.82	0.82	0.82	26	41
0,3m		7	0	0	1	1	1	29.5	7
Nurseries
8m	NORTH (3)	19	19	1	0	0	0	5.5	0		Mean value 8m	0.208274
6m		36	38	1.05556	-0.0555556	0	0	5.5	-2		Mean value 6m	0.0604186
4m		85	84	0.988235	0.0117647	0.0117647	0.0117647	11	1		Mean value 4m	0.170588
2m		10	10	1	0	0	0	5.5	0		Mean value 2m	0.0666667
0,3m		122	132	1.08197	-0.0819672	0	0	5.5	-10		Mean value 0,3m	0.105263
8m	SOUTH (1)	30	17	0.566667	0.433333	0.433333	0.433333	23	13
6m		53	46	0.867925	0.132075	0.132075	0.132075	18	7
4m		12	6	0.5	0.5	0.5	0.5	24	6
2m		50	40	0.8	0.2	0.2	0.2	20.5	10
0,3m		19	13	0.684211	0.315789	0.315789	0.315789	22	6
8m	SOUTH (2)	47	38	0.808511	0.191489	0.191489	0.191489	19	9
6m		61	58	0.95082	0.0491803	0.0491803	0.0491803	14	3
4m		46	51	1.1087	-0.108696	0	0	5.5	-5
2m		67	77	1.14925	-0.149254	0	0	5.5	-10
0,3m		27	29	1.07407	-0.0740741	0	0	5.5	-2

## Sheet: Data for Statistica
Data organized for Statistica analysis					S1 (Transplantation)					S2 (Nursery)
			Transform		D1 (8m)	D2 (6m)	D3 (4m)	D4 (2m)	D5 (0.3m)	D1 (8m)	D2 (6m)	D3 (4m)	D4 (2m)	D5 (0.3m)
Site	Depth	% barnacle eaten	ArcSin		0.05	0.0740741	0	1	0.930556	0.2	0	0.0117647	0	0
Transplant	8 m	0.05	12.921		0.0813953	0.045977	0.03	0.677966	0.912281	0	0.132075	0.5	0.2	0.315789
Transplant	8 m	0.0813953	16.5767		0	0.2	0	0.82	1	0.433333	0.0491803	0	0	0
Transplant	8 m	0	0	MEAN =	0.0437984	0.106684	0.01	0.832655	0.947612	0.211111	0.0604186	0.170588	0.0666667	0.105263
Transplant	6 m	0.0740741	15.7932
Transplant	6 m	0.045977	12.3816
Transplant	6 m	0.2	26.5651					site
Transplant	4 m	0	0					Transplantation	Nursery	Trans STDEV	Nur STDEV	Trans SE	NurSE
Transplant	4 m	0.03	9.97422				0.3 m	0.947612	0.105263	0.0462803	0.182321	0.0267199	0.105263
Transplant	4 m	0	0				2 m	0.832655	0.0666667	0.16139	0.11547	0.0931783	0.0666667
Transplant	2 m	1	90				4 m	0.01	0.170588	0.0173205	0.28534	0.01	0.164741
Transplant	2 m	0.677966	55.4253				6 m	0.106684	0.0604186	0.0820263	0.0667511	0.0473579	0.0385388
Transplant	2 m	0.82	64.8959				8 m	0.0437984	0.211111	0.0410505	0.21688	0.0237005	0.125216
Transplant	0.3 m	0.930556	74.7208
Transplant	0.3 m	0.912281	72.772
Transplant	0.3 m	1	90
Nursery	8 m	0.2	26.5651					site
Nursery	8 m	0	0					Transplantation	Nursery	trans S.E.	nurse S.E.
Nursery	8 m	0.433333	41.1689				0.3 m	0.947612	0.105263	0.02672	0.105263
Nursery	6 m	0	0				2 m	0.832655	0.0666667	0.093178	0.066667
Nursery	6 m	0.132075	21.3105				4 m	0.01	0.170588	0.01	0.164741
Nursery	6 m	0.0491803	12.8128				6 m	0.106684	0.0604186	0.047358	0.038539
Nursery	4 m	0.0117647	6.22685				8 m	0.0437984	0.208274	0.023701	0.125374
Nursery	4 m	0.5	45				Overall (mean)	0.38815	0.122242
Nursery	4 m	0	0				overall (stdev)	0.461352	0.0650729
Nursery	2 m	0	0				Overall SE	0.206323	0.0291015
Nursery	2 m	0.2	26.5651				Percent values
Nursery	2 m	0	0					site
Nursery	0.3 m	0	0					Transplantation	Nursery	Trans SE	NurSE
Nursery	0.3 m	0.315789	34.1909				0.3 m	94.7612	10.5263	2.67199	10.5263
Nursery	0.3 m	0	0				2 m	83.2655	6.66667	9.31783	6.66667
							4 m	1	17.0588	1	16.4741
							6 m	10.6684	6.04186	4.73579	3.85388
							8 m	4.37984	21.1111	2.37005	12.5216
													Tukey HSD test; variable % Barnacles Eaten (Spreadsheet1 in Barnacles)
							REFERENCE						Error: Between MS = .02165, df = 20.000
								Transplantation	Nursery					Site	Depth	{1}	{2}	{3}	{4}	{5}	{6}	{7}	{8}	{9}	{10}
							0.3 m	0.947612	0.105263							.04380	.10668	.01000	.83266	.94761	.20827	.06042	.17059	.06667	.10526
							2 m	0.832655	0.0666667				1	Transplantation	8m		0.999925	1000000	0.000238	0.000190	0.923202	1000000	0.984021	1000000	0.999938
							4 m	0.01	0.170588				2	Transplantation	6m	0.999925		0.997680	0.000374	0.000203	0.996635	0.999994	0.999914	0.999998	1000000
							6 m	0.106684	0.0604186				3	Transplantation	4m	1000000	0.997680		0.000212	0.000188	0.808989	0.999988	0.932620	0.999969	0.997924
							8 m	0.0437984	0.208274				4	Transplantation	2m	0.000238	0.000374	0.000212		0.991793	0.001534	0.000260	0.000844	0.000270	0.000369
													6	Nursery	8m	0.923202	0.996635	0.808989	0.001534	0.000330		0.958032	0.999999	0.967653	0.996274
							Top 94.8, table below how many times higher than each cell						7	Nursery	6m	1000000	0.999994	0.999988	0.000260	0.000192	0.958032		0.993920	1000000	0.999996
													8	Nursery	4m	0.984021	0.999914	0.932620	0.000844	0.000253	0.999999	0.993920		0.996027	0.999897
								Transplantation	Nursery				10	Nursery	0.3m	0.999938	1000000	0.997924	0.000369	0.000203	0.996274	0.999996	0.999897	0.999999
							0.3 m	1	9.00231		1
							2 m	1.13806	14.2142		1.13806
							4 m	94.7612	5.55497		4.54983
							6 m	8.88245	15.6841		5.55497
							8 m	21.6357	4.54983		8.88245
											9.00231
											14.2142
											15.6841
											21.6357
											94.7612
